# Supplementary material
Source: PubMed Central journal article supplement (PMC4702201)
Supplement: jcsm.12.1.25s1.pdf [file jcsm.12.1.25s1.pdf]

**Table S1. Comparison between participants who did and did not undergo abdominal CT**

|                                              | CT (-)                              | CT (+)                             | p-value |
|----------------------------------------------|-------------------------------------|------------------------------------|---------|
| Number, n                                    | 67                                  | 237                                |         |
| Male/Female, n                               | 46/21                               | 183/54                             | 0.15    |
| Age, y                                       | 55.4 ± 14.9                         | 55.5 ± 13.4                        | 0.87    |
| BMI, kg/m <sup>2</sup>                       | 25.7 ± 4.1                          | 27.1 ± 6.0                         | 0.15    |
| WC, cm                                       | 91.8 ± 9.3                          | 94.9 ± 12.0                        | 0.062   |
| Smoking status,<br>current/past/never, n (%) | 15/23/29<br>(22.4/34.3/43.3)        | 33/92/112<br>(13.9/38.8/47.3)      | 0.24    |
| Comorbidities                                |                                     |                                    |         |
| HT, n (%)                                    | 42 (62.7)                           | 135 (57.0)                         | 0.40    |
| HL, n (%)                                    | 41 (61.2)                           | 156 (65.8)                         | 0.48    |
| DM, n (%)                                    | 13 (19.4)                           | 52 (21.9)                          | 0.65    |
| CVD, n (%)                                   | 5 (7.5)                             | 24 (10.1)                          | 0.51    |
| OSA, non/mild/moderate/severe, n (%)         | 16/18/9/24<br>(23.9/26.9/13.4/35.8) | 33/58/63/83<br>(13.9/24.5/26.6/35) | 0.067   |

Values are given as mean ± SD.

BMI, body mass index; WC, waist circumference; HT, hypertension; HL, hyperlipidemia; DM, diabetes mellitus; CVD, cardiovascular disease; OSA, obstructive sleep apnea.

**Table S2. Comparison between participants who did and did not undergo blood examinations of calcium, osteocalcin, and 25-hydroxy vitamin D**

|                                              | Blood examination (-)                | Blood examination (+)            | p-value |
|----------------------------------------------|--------------------------------------|----------------------------------|---------|
| Number, n                                    | 130                                  | 104                              |         |
| Male/Female, n                               | 99/31                                | 81/23                            | 0.75    |
| Age, y                                       | 55.0 ± 14.3                          | 56.1 ± 12.2                      | 0.86    |
| BMI, kg/m <sup>2</sup>                       | 26.9 ± 6.5                           | 27.2 ± 4.5                       | 0.077   |
| WC, cm                                       | 94.9 ± 13.4                          | 95.0 ± 10.2                      | 0.38    |
| Smoking status,<br>current/past/never, n (%) | 19/54/57<br>(14.6/41.5/43.9)         | 13/37/54<br>(12.5/35.6/51.9)     | 0.47    |
| Comorbidities                                |                                      |                                  |         |
| HT, n (%)                                    | 75 (57.7)                            | 58 (53.8)                        | 0.77    |
| HL, n (%)                                    | 84 (66.2)                            | 71 (68.3)                        | 0.56    |
| DM, n (%)                                    | 31 (23.9)                            | 19 (18.3)                        | 0.30    |
| CVD, n (%)                                   | 15 (11.5)                            | 7 (6.7)                          | 0.21    |
| OSA, non/mild/moderate/severe, n (%)         | 24/29/36/41<br>(18.5/22.3/27.7/31.5) | 9/28/26/41<br>(8.7/26.9/25/39.4) | 0.13    |

Values are given as mean ± SD.

BMI, body mass index; WC, waist circumference; HT, hypertension; HL, hyperlipidemia; DM, diabetes mellitus; CVD, cardiovascular disease; OSA, obstructive sleep apnea.

**Table S3. Clinical characteristic of participants who underwent blood examinations of calcium, osteocalcin, and 25-hydroxy vitamin D**

|                                       | Total       | Non OSA      | Mild OSA           | Moderate OSA               | Severe OSA                     | p-value |
|---------------------------------------|-------------|--------------|--------------------|----------------------------|--------------------------------|---------|
| Number                                | 104         | 9            | 28                 | 26                         | 41                             |         |
| Male/Female, n                        | 81/23       | 7/2          | 20/8               | 22/4                       | 32/9                           | 0.71    |
| Age, y                                | 56.1 ± 12.2 | 56.6 ± 15.3  | 55.8 ± 13.4        | 55.3 ± 11.8                | 56.7 ± 11.3                    | 0.97    |
| BMI, kg/m <sup>2</sup>                | 27.2 ± 4.5  | 24.5 ± 3.8   | 25.7 ± 3.7         | 27.0 ± 4.7                 | 29.1 ± 4.4 <sup>a, b</sup>     | 0.0021  |
| WC, cm                                | 95.0 ± 10.2 | 88.2 ± 9.3   | 91.7 ± 9.9         | 94.9 ± 11.0                | 98.9 ± 8.8 <sup>a, b</sup>     | 0.0042  |
| Ca, mg/dL                             | 9.3 ± 0.4   | 9.2 ± 0.3    | 9.2 ± 0.4          | 9.3 ± 0.2                  | 9.3 ± 0.5                      | 0.54    |
| 25-hydroxy vitamin D                  | 22.9 ± 5.2  | 25.0 ± 7.9   | 22.0 ± 4.9         | 24.2 ± 4.4                 | 22.2 ± 4.9                     | 0.19    |
| Osteocalcin                           | 4.2 ± 2.1   | 3.9 ± 2.2    | 4.8 ± 1.8          | 4.9 ± 2.4                  | 3.6 ± 2.1                      | 0.048   |
| CRP, mg/dL                            | 0.10 ± 0.11 | 0.067 ± 0.11 | 0.054 ± 0.058      | 0.10 ± 0.11                | 0.14 ± 0.13 <sup>b</sup>       | 0.0096  |
| Smoking status,<br>current/past/never | 13/37/54    | 2/5/2        | 4/6/18             | 2/13/11                    | 5/13/23                        | 0.19    |
| Comorbidities                         |             |              |                    |                            |                                |         |
| HT, n (%)                             | 58 (55.8)   | 3 (33.3)     | 16 (57.1)          | 15 (46.2)                  | 27 (65.9)                      | 0.21    |
| HL, n (%)                             | 71 (68.3)   | 7 (77.9)     | 15 (53.6)          | 21 (80.8)                  | 28 (68.3)                      | 0.17    |
| DM, n (%)                             | 19 (18.3)   | 2 (22.2)     | 0 (0) <sup>a</sup> | 6 (23.1) <sup>b</sup>      | 11 (26.8) <sup>b</sup>         | 0.0035  |
| CVD, n (%)                            | 7 (6.7)     | 0 (0)        | 2 (7.1)            | 4 (15.4)                   | 1 (2.4)                        | 0.16    |
| AHI, /h                               | 27.2 ± 19.4 | 3.4 ± 1.6    | 10.4 ± 2.5         | 21.0 ± 4.2 <sup>a, b</sup> | 47.9 ± 12.8 <sup>a, b, c</sup> | <0.0001 |

Values are given as mean ± SD.

<sup>a</sup> p < 0.05 versus non OSA; <sup>b</sup> p < 0.05 versus mild OSA; <sup>c</sup> p < 0.05 versus moderate OSA

OSA, obstructive sleep apnea, BMI, body mass index; WC, waist circumference; CRP, C-reactive protein; HT, hypertension; HL, hyperlipidemia; DM, diabetes mellitus; CVD, cardiovascular disease; AHI, apnea-hypopnea index.
